# Supplementary material for: Polyethylenimine-modified bimetallic Au@Rh core–shell mesoporous nanospheres surpass Pt for pH-universal hydrogen evolution electrocatalysis
Source: Royal Society of Chemistry journal article supplement (doi:10.1039/d1ta03198h), 2021-01-01
Supplement: d1ta03198h1.pdf [file d1ta03198h1.pdf]

### Electronic Supplementary Information

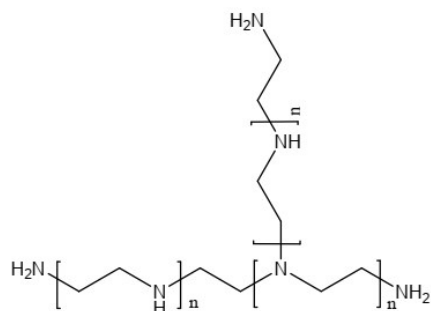

**Scheme S1** Molecular structure of PEI.

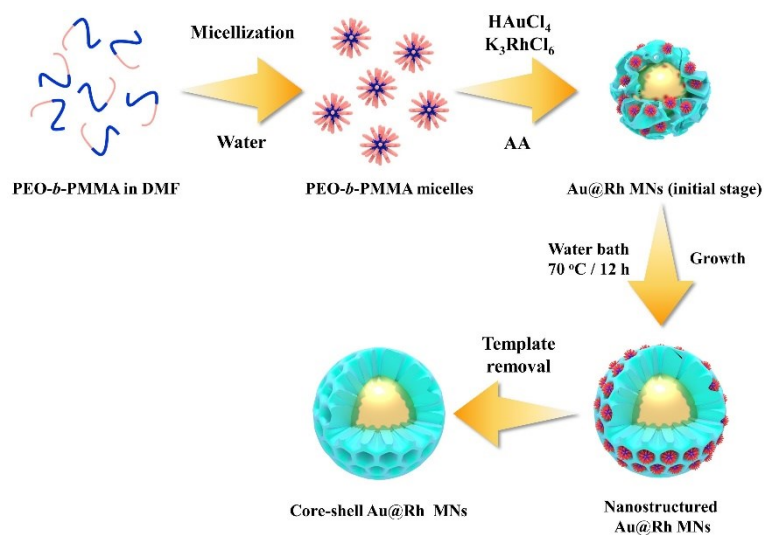

**Fig. S1** Schematic showing for the fabrication process of Au@Rh MNs.

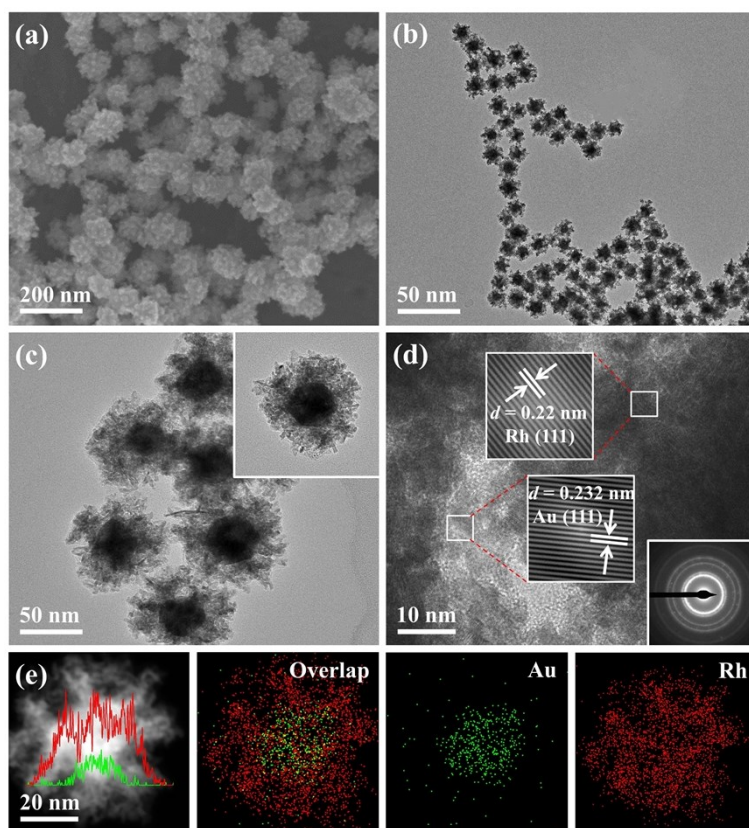

**Fig. S2** (a) SEM image, (b and c) TEM images and (d) HRTEM image and the lattice fringes of the corresponding areas. The inset in (d) is the SAED pattern. (e) HAADF-STEM image, compositional line profiles and corresponding element mappings of Au and Rh for Au@Rh MNs.

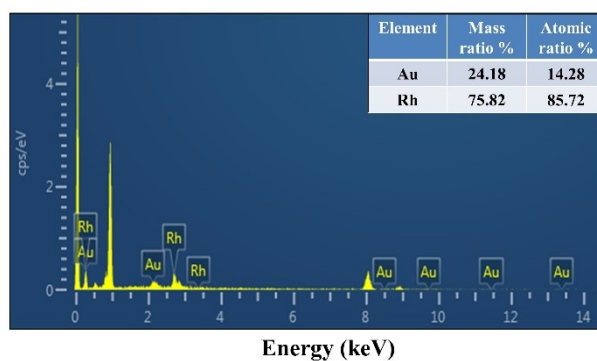

**Fig. S3** SEM-EDX spectrum of Au@Rh MNs.

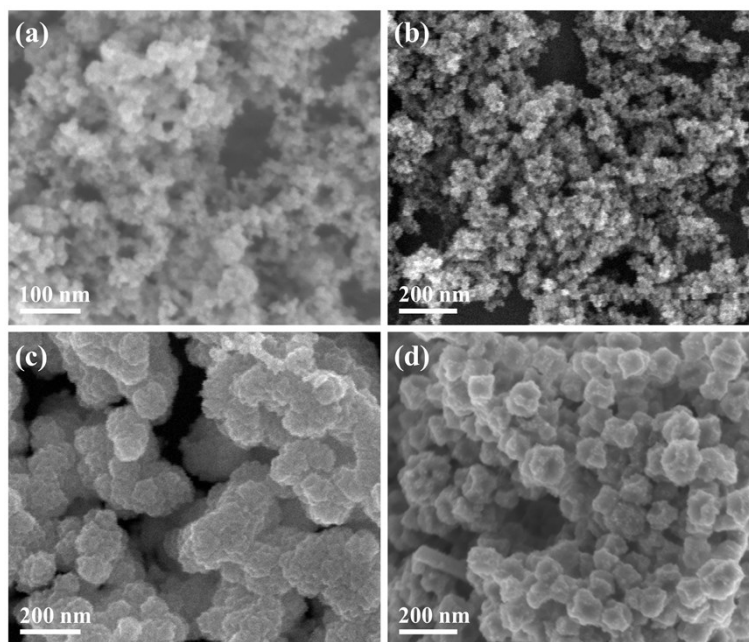

**Fig. S4** SEM images of Au@Rh MNs obtained by replacing AA with (a) NaBH<sub>4</sub>, (b) HCOOH, (c) NaH<sub>2</sub>PO<sub>2</sub> and (d) C<sub>2</sub>H<sub>5</sub>OH.

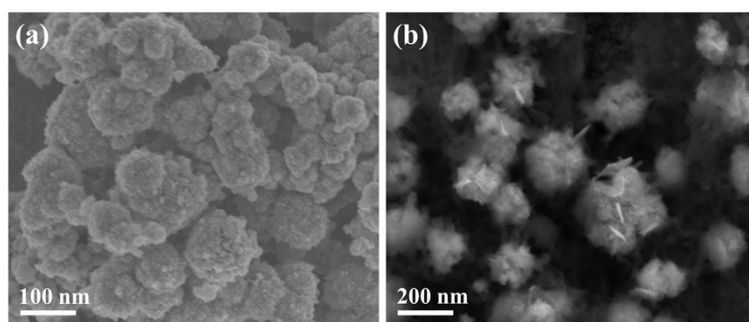

**Fig. S5** SEM images of Au@Rh MNs obtained (a) without any surfactant and (b) with PS<sub>18000</sub>-*b*-PEO<sub>7500</sub>.

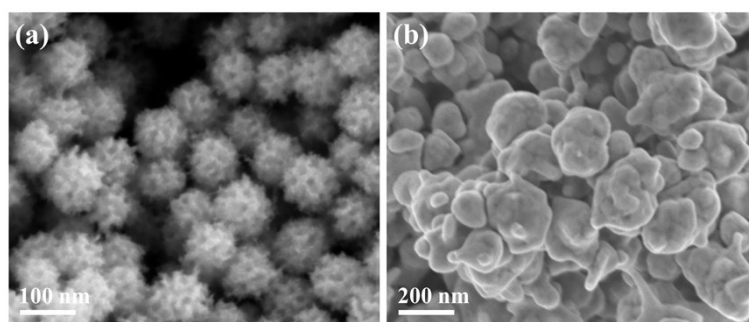

**Fig. S6** SEM images of (a) Rh MNs and (b) Au NPs.

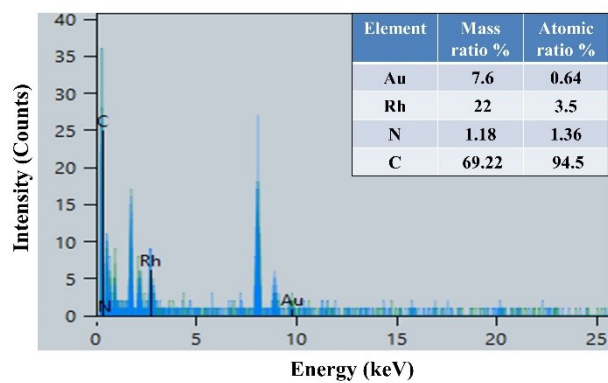

Fig. S7 TEM-EDX spectrum of Au@Rh@PEI MNs.

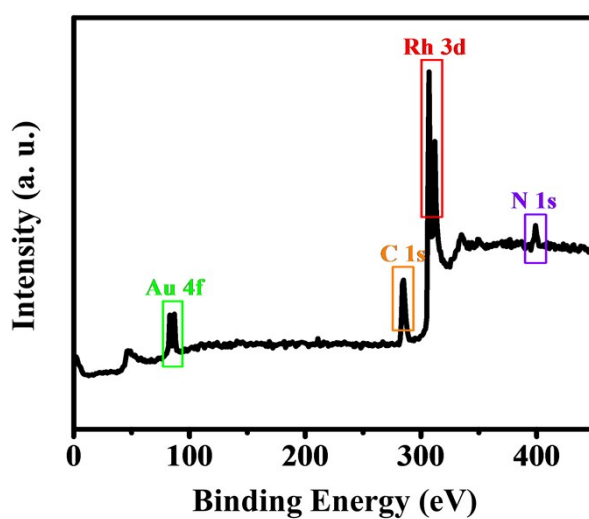

Fig. S8 XPS survey spectrum of Au@Rh@PEI MNs.

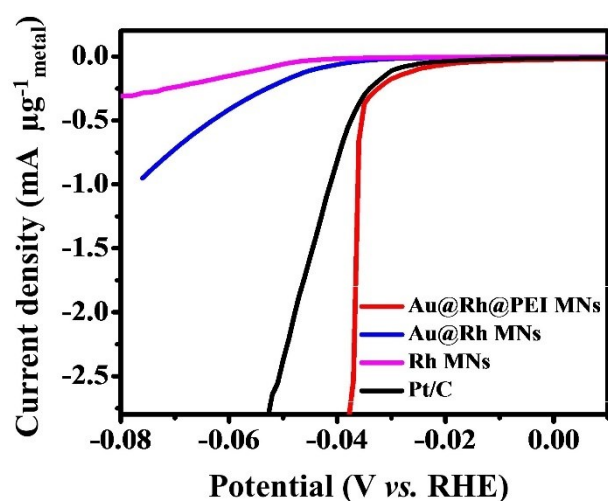

Fig. S9 Metal mass-normalized LSV curves of different catalysts for HER in 0.5 M H<sub>2</sub>SO<sub>4</sub>.

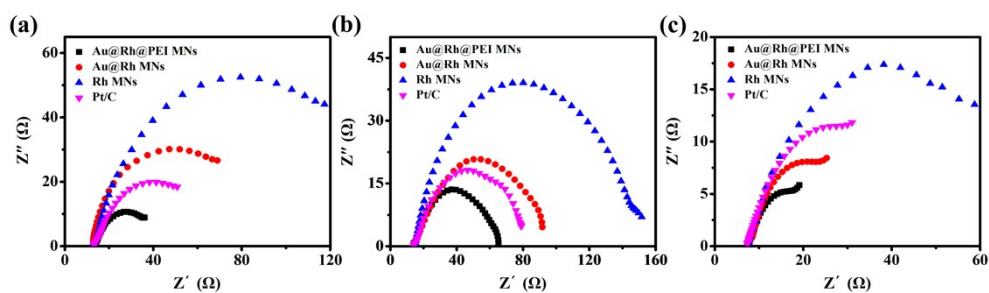

**Fig. S10** EIS spectra of various catalysts in (a) 0.5 M H<sub>2</sub>SO<sub>4</sub>, (b) 1 M KOH and (c) 1 M PBS. The applied potentials in 0.5 M H<sub>2</sub>SO<sub>4</sub>, 1 M KOH and 1 M PBS are -0.073 V (vs. RHE), -0.276 V (vs. RHE) and -0.136 V (vs. RHE), respectively.

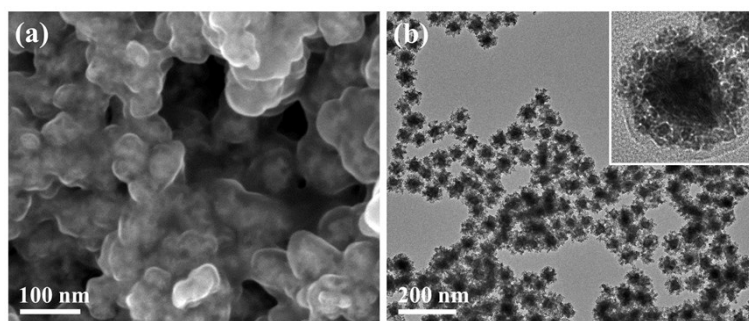

**Fig. S11** (a) SEM image and (b) TEM images of Au@Rh@PEI MNs in neutral media after 24 h *V-t* test.

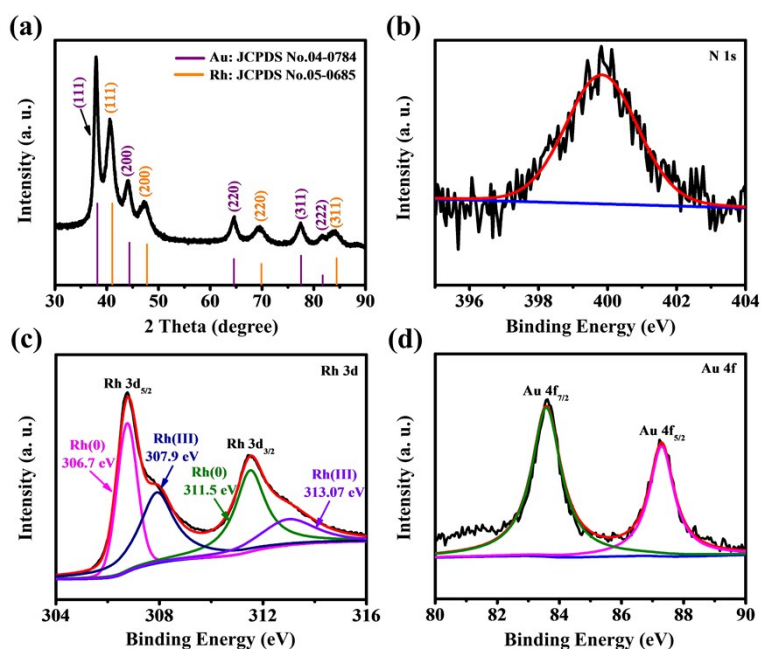

**Fig. S12** (a) XRD pattern, high-resolution (b) N 1s, (c) Rh 3d and (d) Au 4f XPS spectra of Au@Rh@PEI MNs in neutral media after HER stability testing.

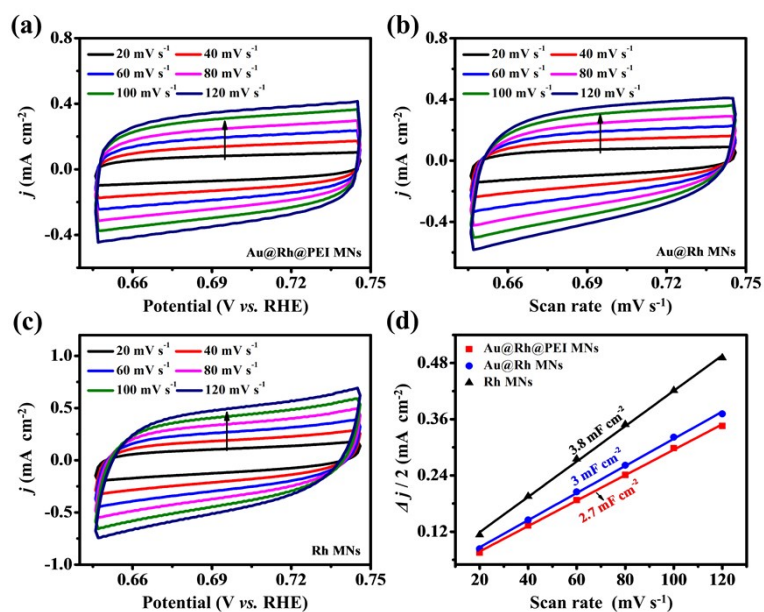

**Fig. S13** CV curves at various scan rates of (a) Au@Rh@PEI MNs, (b) Au@Rh MNs and (c) Rh MNs with potential ranges from 0.646 to 0.746 V (vs. RHE) in 1 M PBS solution. (d) The corresponding capacitive current densities of different catalysts at 0.696 V (vs. RHE).

**Table S1.** HER performance comparison in acidic media between the Au@Rh@PEI MNs and some other reported electrocatalysts.

| Electrocatalysts                                                      | Electrolytes                             | Electrode substrate                                                    | Overpotential @ 10 mA cm <sup>-2</sup> (mV) | Tafel slope (mV dec <sup>-1</sup> ) | Ref.             |
|-----------------------------------------------------------------------|------------------------------------------|------------------------------------------------------------------------|---------------------------------------------|-------------------------------------|------------------|
| <b>Au@Rh@PEI MNs</b>                                                  | <b>0.5 M H<sub>2</sub>SO<sub>4</sub></b> | <b>glassy carbon electrode (GCE loading ~ 0.05 mg cm<sup>-2</sup>)</b> | <b>30</b>                                   | <b>30</b>                           | <b>This work</b> |
| RhCoB aerogels                                                        | 0.5 M H <sub>2</sub> SO <sub>4</sub>     | GCE (loading ~ 0.085 mg cm <sup>-2</sup> )                             | 12                                          | 30.7                                | 1                |
| boron-doped RhFe alloy                                                | 0.5 M H <sub>2</sub> SO <sub>4</sub>     | rotating disk electrode (RDE: loading ~ 0.51 mg cm <sup>-2</sup> )     | 25                                          | 32                                  | 2                |
| Rh <sub>2</sub> S <sub>3</sub> hexagonal nanoprisms                   | 0.5 M H <sub>2</sub> SO <sub>4</sub>     | RDE (loading ~ 0.153 mg cm <sup>-2</sup> )                             | 117                                         | 44                                  | 3                |
| Rh <sub>2</sub> P/XC-72                                               | 0.5 M H <sub>2</sub> SO <sub>4</sub>     | GCE (loading ~ 0.0225 mg cm <sup>-2</sup> )                            | 14                                          | 31.7                                | 4                |
| Rh-MoS <sub>2</sub>                                                   | 0.5 M H <sub>2</sub> SO <sub>4</sub>     | GCE (loading ~ 0.309 mg cm <sup>-2</sup> )                             | 47                                          | 24                                  | 5                |
| Rh <sub>x</sub> P/NPC                                                 | 0.5 M H <sub>2</sub> SO <sub>4</sub>     | GCE (loading ~ 0.0017 mg cm <sup>-2</sup> )                            | 19                                          | 36                                  | 6                |
| Rh Hollow nanoparticle/C                                              | 0.5 M H <sub>2</sub> SO <sub>4</sub>     | GCE (loading ~ 0.018 mg cm <sup>-2</sup> )                             | 28.1                                        | 24                                  | 7                |
| Rh-Ag-Si ternary composites                                           | 0.5 M H <sub>2</sub> SO <sub>4</sub>     | (RDE: loading ~ 0.140 mg cm <sup>-2</sup> )                            | 120                                         | 51                                  | 8                |
| Rh-Au-Si nanocomposite                                                | 0.5 M H <sub>2</sub> SO <sub>4</sub>     | GCE (loading ~ 0.255 mg cm <sup>-2</sup> )                             | 60                                          | 24                                  | 9                |
| rGO/CoP-Rh catalysts                                                  | 0.5 M H <sub>2</sub> SO <sub>4</sub>     | GCE (loading ~ 0.218 mg cm <sup>-2</sup> )                             | 72                                          | 43                                  | 10               |
| PtRh DNAs                                                             | 0.5 M H <sub>2</sub> SO <sub>4</sub>     | GCE (loading ~ 0.225 mg cm <sup>-2</sup> )                             | 27                                          | 30                                  | 11               |
| Rh <sub>50</sub> Ru <sub>50</sub> @UiO <sub>66</sub> -NH <sub>2</sub> | 0.5 M H <sub>2</sub> SO <sub>4</sub>     | GCE (loading ~ 0.343 mg cm <sup>-2</sup> )                             | 77                                          | 79                                  | 12               |

**Table S2.** HER performance comparison in alkaline media between the Au@Rh@PEI MNs and some other reported electrocatalysts.

| Electrocatalysts                                          | Electrolytes  | Electrode substrate                            | Overpotential @ 10 mA cm <sup>-2</sup> (mV) | Tafel slope (mV dec <sup>-1</sup> ) | Ref.             |
|-----------------------------------------------------------|---------------|------------------------------------------------|---------------------------------------------|-------------------------------------|------------------|
| <b>Au@Rh@PEI MNs</b>                                      | <b>1M KOH</b> | <b>GCE (loading ~ 0.05 mg cm<sup>-2</sup>)</b> | <b>29</b>                                   | <b>31</b>                           | <b>This work</b> |
| RhCoB aerogel                                             | 1M KOH        | GCE (loading ~0.085 mg cm <sup>-2</sup> )      | 43                                          | 40.5                                | 1                |
| Rh <sub>2</sub> P/XC-72                                   | 1M KOH        | GCE (loading ~0.0225 mg cm <sup>-2</sup> )     | 30                                          | 50                                  | 4                |
| PtRh DNAs                                                 | 1M KOH        | GCE (loading ~0.225 mg cm <sup>-2</sup> )      | 28                                          | 47                                  | 11               |
| Rh <sub>50</sub> Ru <sub>50</sub> @UiO-66-NH <sub>2</sub> | 1M KOH        | GCE (loading ~0.343 mg cm <sup>-2</sup> )      | 176                                         | 112                                 | 12               |
| RuP <sub>2</sub> @NPC                                     | 1M KOH        | GCE (loading ~1.0 mg cm <sup>-2</sup> )        | 52                                          | 69                                  | 13               |
| Rh NSs/CNTs                                               | 1M KOH        | GCE (loading ~0.015 mg cm <sup>-2</sup> )      | 43                                          | 107                                 | 14               |
| IrRh NAs                                                  | 1M KOH        | GCE (loading ~0.281 mg cm <sup>-2</sup> )      | 35                                          | 48.4                                | 15               |
| Rh-Rh <sub>2</sub> O <sub>3</sub> -NPs/C                  | 1M KOH        | GCE (loading ~0.028 mg cm <sup>-2</sup> )      | 63                                          | 70                                  | 16               |
| MoP <sub>2</sub> NS/CC                                    | 1M KOH        | CC (loading ~7.8 mg cm <sup>-2</sup> )         | 85                                          | 70                                  | 17               |
| Mn-CoP/Ti                                                 | 1M KOH        | Ti (loading ~5.61 mg cm <sup>-2</sup> )        | 76                                          | 52                                  | 18               |
| NiRu@N-C                                                  | 1M KOH        | GCE (loading ~0.273 mg cm <sup>-2</sup> )      | 50                                          | 36                                  | 19               |



**Table S3.** HER performance comparison in neutral media between the Au@Rh@PEI MNs and some other reported electrocatalysts.

| <b>Electrocatalysts</b>                                   | <b>Electrolytes</b> | <b>Electrode substrate</b>                     | <b>Overpotential @ 10 mA cm<sup>-2</sup> (mV)</b> | <b>Tafel slope (mV dec<sup>-1</sup>)</b> | <b>Ref.</b>      |
|-----------------------------------------------------------|---------------------|------------------------------------------------|---------------------------------------------------|------------------------------------------|------------------|
| <b>Au@Rh@PEI</b>                                          | <b>1 M PBS</b>      | <b>GCE (loading ~ 0.05 mg cm<sup>-2</sup>)</b> | <b>24</b>                                         | <b>39</b>                                | <b>This work</b> |
| RhCoB aerogel                                             | 1 M PBS             | GCE (loading ~0.085 mg cm <sup>-2</sup> )      | 113                                               | 149.1                                    | 1                |
| Rh <sub>2</sub> P-based electrocatalyst                   | 1 M PBS             | GCE (loading ~0.0225 mg cm <sup>-2</sup> )     | 38                                                | 46                                       | 4                |
| PtRh DNAs                                                 | 1 M PBS             | GCE (loading ~0.225 mg cm <sup>-2</sup> )      | 23                                                | 87                                       | 11               |
| Rh <sub>50</sub> Ru <sub>50</sub> @UiO-66-NH <sub>2</sub> | 1 M PBS             | GCE (loading ~0.343 mg cm <sup>-2</sup> )      | 111                                               | 93.4                                     | 12               |
| RuP <sub>2</sub> @NPC                                     | 1 M PBS             | GCE (loading ~1.0 mg cm <sup>-2</sup> )        | 57                                                | 87                                       | 13               |
| OsP <sub>2</sub> @NPC                                     | 1 M PBS             | GCE (loading ~0.43 mg cm <sup>-2</sup> )       | 54                                                | 82                                       | 20               |
| Ni-Co-P-H microflowers                                    | 1 M PBS             | GCE (loading ~0.4 mg cm <sup>-2</sup> )        | 157                                               | 84                                       | 21               |
| CoP-400                                                   | 1 M PBS             | GCE (loading ~0.43 mg cm <sup>-2</sup> )       | 161                                               | 81                                       | 22               |
| Ru@Co-SAs/N-C                                             | 1 M PBS             | GCE (loading ~0.285 mg cm <sup>-2</sup> )      | 55                                                | 82                                       | 23               |
| RhCu nanotubes                                            | 0.1 M PBS           | GCE (loading ~0.24 mg cm <sup>-2</sup> )       | 57                                                | 95                                       | 24               |

## References

1. K. Deng, T. Ren, Y. Xu, S. Liu, Z. Dai, Z. Wang, X. Li, L. Wang and H. Wang, *J. Mater. Chem.A*, 2020, **8**, 5595-5600.
2. L. Zhang, J. Lu, S. Yin, L. Luo, S. Jing, A. Brouzgou, J. Chen, P. K. Shen and P. Tsiakaras, *Appl. Catal., B*, 2018, **230**, 58-64.
3. D. Yoon, B. Seo, J. Lee, K. S. Nam, B. Kim, S. Park, H. Baik, S. Hoon Joo and K. Lee, *Energy Environ. Sci.*, 2016, **9**, 850-856.
4. F. Yang, Y. Zhao, Y. Du, Y. Chen, G. Cheng, S. Chen and W. Luo, *Adv. Energy Mater.*, 2018, **8**, 1703489.
5. Y. Cheng, S. Lu, F. Liao, L. Liu, Y. Li and M. Shao, *Adv. Funct. Mater.*, 2017, **27**, 1700359.
6. Q. Qin, H. Jang, L. Chen, G. Nam, X. Liu and J. Cho, *Adv. Energy Mater.*, 2018, **8**, 1801478.
7. J. Du, X. Wang, C. Li, X.-Y. Liu, L. Gu and H.-P. Liang, *Electrochim. Acta*, 2018, **282**, 853-859.
8. B. Jiang, Y. Sun, F. Liao, W. Shen, H. Lin, H. Wang and M. Shao, *J. Mater. Chem.A*, 2017, **5**, 1623-1628.
9. B. Jiang, L. Yang, F. Liao, M. Sheng, H. Zhao, H. Lin and M. Shao, *Nano Res.*, 2017, **10**, 1749-1755.
10. H. Zheng, X. Huang, H. Gao, W. Dong, G. Lu, X. Chen and G. Wang, *J. Energy Chem.*, 2019, **34**, 72-79.
11. Y. Liu, X. Li, Q. Zhang, W. Li, Y. Xie, H. Liu, L. Shang, Z. Liu, Z. Chen, L. Gu, Z. Tang, T. Zhang and S. Lu, *Angew. Chem., Int. Ed. Engl.*, 2020, **59**, 1718-1726.
12. Z. Ding, K. Wang, Z. Mai, G. He, Z. Liu and Z. Tang, *Int. J. Hydrogen Energy*, 2019, **44**, 24680-24689.
13. Z. Pu, I. S. Amiinu, Z. Kou, W. Li and S. Mu, *Angew. Chem., Int. Ed.*, 2017, **56**, 11559-11564.
14. N. Zhang, Q. Shao, Y. Pi, J. Guo and X. Huang, *Chem. Mater.*, 2017, **29**, 5009-5015.
15. C. Li, Y. Xu, S. Liu, S. Yin, H. Yu, Z. Wang, X. Li, L. Wang and H. Wang, *ACS Sustain. Chem. Eng.*, 2019, **7**, 15747-15754.
16. M. K. Kundu, R. Mishra, T. Bhowmik and S. Barman, *J. Mater. Chem. A*, 2018, **6**, 23531-23541.
17. W. Zhu, C. Tang, D. Liu, J. Wang, A. M. Asiri and X. Sun, *J. Mater. Chem.A*, 2016, **4**, 7169-7173.
18. T. Liu, X. Ma, D. Liu, S. Hao, G. Du, Y. Ma, A. M. Asiri, X. Sun and L. Chen, *ACS Catal.*, 2017, **7**, 98-102.
19. Y. Xu, S. Yin, C. Li, K. Deng, H. Xue, X. Li, H. Wang and L. Wang, *J. Mater. Chem.A*, 2018, **6**, 1376-1381.
20. L. Fang, Y. Wang, X. Yang, H. Zhang and Y. Wang, *J Catal*, 2019, **370**, 404-411.
21. X. Liu, S. Deng, D. Xiao, M. Gong, J. Liang, T. Zhao, T. Shen and D. Wang, *ACS Appl. Mater. Interfaces*, 2019, **11**, 42233-42242.
22. H. Li, X. Zhao, H. Liu, S. Chen, X. Yang, C. Lv, H. Zhang, X. She and D. Yang, *small*, 2018, **14**, e1802824.
23. S. Yuan, Z. Pu, H. Zhou, J. Yu, I. S. Amiinu, J. Zhu, Q. Liang, J. Yang, D. He, Z. Hu, G. Van Tendeloo and S. Mu, *Nano Energy*, 2019, **59**, 472-480.
24. D. Cao, H. Xu and D. Cheng, *Adv. Energy Mater.*, 2020, **10**, 1903038.
